# Supplementary material
Source: PubMed Central journal article supplement (PMC4047286)
Supplement: supp_bhs380_bhs380supp_fig1.pdf [file supp_bhs380_bhs380supp_fig1.pdf]

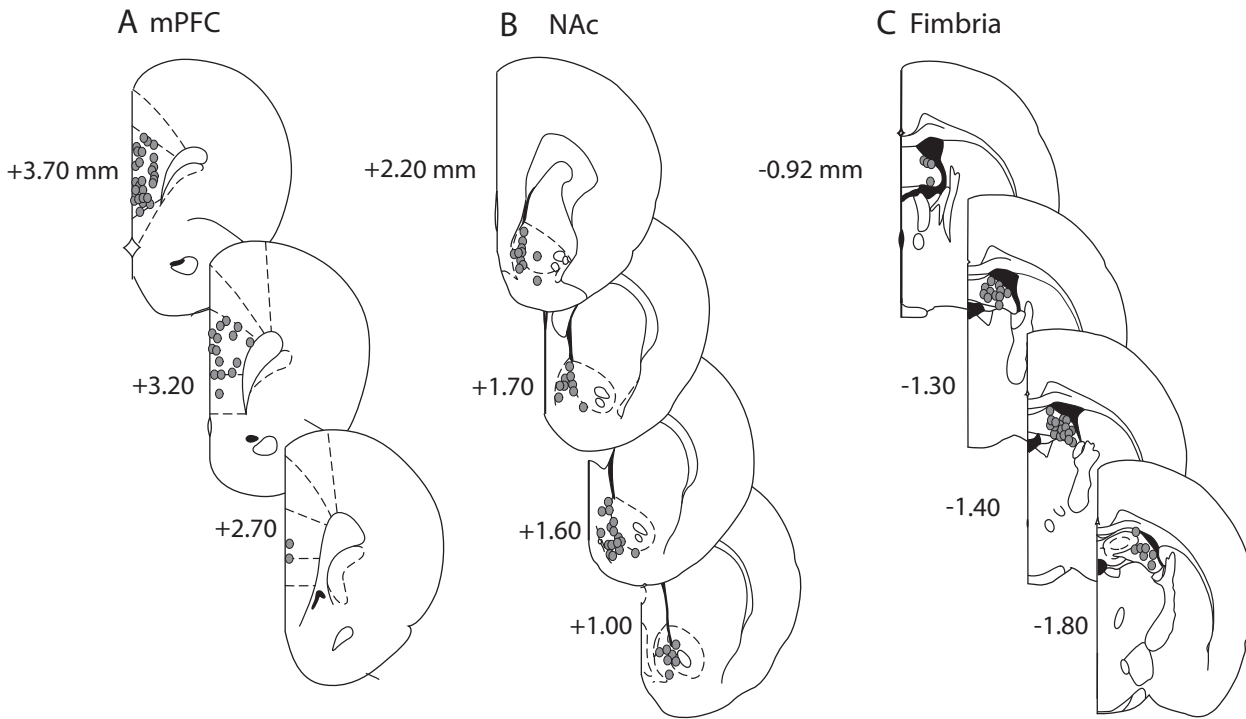

Supplemental  
Figure 1

Supplemental figure 1. Schematic showing the representative placements of stimulating and recording electrodes, shown as coronal sections of the rat brain, taken from Paxinos and Watson (Paxinos and Watson, 1996).

(A) Placement of chemotrodes for stimulation and infusion in the mPFC. (B) Location of recording electrodes in the NAc.

(C) Site of stimulation electrodes in fimbria.

(A-C) Numbers to the right indicate millimeters A/P from bregma; approximately 50% of placements are shown.
