# Supplementary material
Source: PubMed Central journal article supplement (PMC4047286)
Supplement: supp_bhs380_bhs380supp_fig2.pdf [file supp_bhs380_bhs380supp_fig2.pdf]

### A HFS to fimbria; TTX in PFC

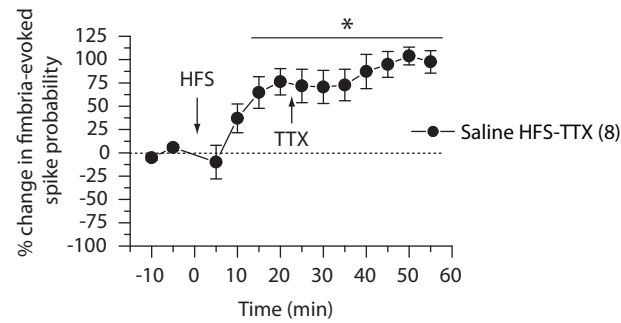

### B Saline rats

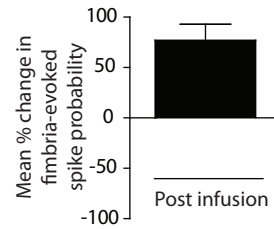

## Supplemental Figure 2

Supplemental figure 2. Tetanization of the fimbria induces a long term potentiation that is not affected by infusion of TTX into the mPFC.

(A) Mean percent change ( $\pm$ SEM) in fimbria-evoked spike probability, normalized to baseline, following tetanization of the fimbria and infusion of TTX in the mPFC in saline-treated animals (\* $p$ <0.05; arrows indicate time of stimulation and infusion).

(B) Mean of the percent change in fimbria-evoked responses ( $\pm$ SEM) following infusion of TTX in saline-treated animals.
